# Supplementary material
Source: ML conference proceedings conference paper supplement (https://openreview.net/forum?id=F5VLmQJHgd)
Supplement: supplementary_material [file attachment]

---

# Causal Effect Estimation from Observational and Interventional Data Through Matrix Weighted Linear Estimators (Supplementary Material)

---

**Klaus-Rudolf Kladny**<sup>1,2</sup>

**Julius von Kügelgen**<sup>2,3</sup>

**Bernhard Schölkopf**<sup>1,2</sup>

**Michael Muehlebach**<sup>2</sup>

<sup>1</sup>Department of Computer Science, ETH Zürich, Switzerland

<sup>2</sup>Max Planck Institute for Intelligent Systems Tübingen, Germany

<sup>3</sup>Department of Engineering, University of Cambridge, United Kingdom

## A PROOFS

### A.1 PROPOSITION 4.1

*Proof.* We begin by observing that we can write  $\mathbf{W}_p^m$  as

$$\mathbf{W}_p^m = \left( m^{-1} \mathbf{X}_1^\top \mathbf{X}_1 + \frac{n}{m} n^{-1} \mathbf{X}_0^\top \mathbf{X}_0 \right)^{-1} (m^{-1} \mathbf{X}_1^\top \mathbf{X}_1). \quad (\text{A})$$

We apply the strong law of large numbers to obtain that

$$m^{-1} \mathbf{X}_1^\top \mathbf{X}_1 \xrightarrow{a.s.} \mathbf{Cov}(\mathbf{X}_1) \quad \text{and} \quad n^{-1} \mathbf{X}_0^\top \mathbf{X}_0 \xrightarrow{a.s.} \mathbf{Cov}(\mathbf{X}_0).$$

Due to the fact that  $\lim_{m \rightarrow \infty} \frac{n(m)}{m} = c$  for some  $c > 0$ , we conclude

$$\mathbf{W}_p^m \xrightarrow{a.s.} \mathbf{W}_\infty := (\mathbf{Cov}(\mathbf{X}_1) + c \cdot \mathbf{Cov}(\mathbf{X}_0))^{-1} \mathbf{Cov}(\mathbf{X}_1).$$

We observe that

$$(\mathbf{I} - \mathbf{W}_\infty) = (\mathbf{Cov}(\mathbf{X}_1) + c \cdot \mathbf{Cov}(\mathbf{X}_0))^{-1} c \cdot \mathbf{Cov}(\mathbf{X}_0).$$

Since both covariance matrices are positive definite, so is  $\mathbf{Cov}(\mathbf{X}_1) + c \cdot \mathbf{Cov}(\mathbf{X}_0)$ . We conclude that the smallest singular value of  $\mathbf{I} - \mathbf{W}_\infty$  is strictly greater than 0. This means

$$\|\mathbb{E}[\hat{\alpha}_{\mathbf{W}_\infty}^m] - \alpha\|_2^2 = \|(\mathbf{I}_p - \mathbf{W}_\infty) \Delta\|_2^2 \geq c' \|\Delta\|_2^2,$$

for some fixed constant  $c' > 0$ . We obtain therefore

$$0 < \lim_{m \rightarrow \infty} \|\mathbb{E}[\hat{\alpha}_{\mathbf{W}_\infty}^m] - \alpha\|_2^2 \leq \lim_{m \rightarrow \infty} \text{MSE}(\hat{\alpha}_{\mathbf{W}_\infty}^m),$$

where we invoked Jensen's inequality. We see that  $\mathbf{W}_\infty$  is constant and bounded. We note that almost sure convergence implies convergence in probability. We can thus apply Lemma B.1, which yields the desired result

$$0 < \lim_{m \rightarrow \infty} \text{MSE}(\hat{\alpha}_{\mathbf{W}_\infty}^m) \leq \lim_{m \rightarrow \infty} \text{MSE}(\hat{\alpha}_{\mathbf{W}_p^m}^m).$$

□

## A.2 PROPOSITION 4.2

**Proposition 4.2.** *Let  $\lim_{m \rightarrow \infty} \frac{n(m)}{m} = 0$ . Then, it holds that*

$$\lim_{m \rightarrow \infty} \text{MSE}(\hat{\alpha}_p^m) = 0.$$

*Proof.* Similar to the proof of Proposition 4.1, we employ the formulation of (A) and consider the term

$$\frac{n}{m} \cdot n^{-1} \mathbf{X}_o^\top \mathbf{X}_o.$$

We see that  $\lim_{m \rightarrow \infty} \frac{n(m)}{m} = 0$  and by the strong law of large numbers,  $n^{-1} \mathbf{X}_o^\top \mathbf{X}_o \xrightarrow{a.s.} \text{Cov}(\mathbf{X}_o)$ . Hence, we obtain that

$$\frac{n}{m} \cdot n^{-1} \mathbf{X}_o^\top \mathbf{X}_o \xrightarrow{a.s.} \mathbf{0}.$$

By the continuous mapping theorem, we conclude that

$$\mathbf{W}_p^m \xrightarrow{a.s.} \mathbf{I}_p,$$

and by Lemma B.2, this implies that

$$\lim_{m \rightarrow \infty} \text{MSE}(\hat{\alpha}_{\mathbf{W}_p^m}^m) \leq \lim_{m \rightarrow \infty} \text{MSE}(\hat{\alpha}_1^m) = 0.$$

□

## A.3 PROPOSITION 4.3

*Proof.* We rewrite  $\widehat{\mathbf{W}}_*^m$  as follows:

$$\begin{aligned} \widehat{\mathbf{W}}_*^m &= \left( n^{-1} (n^{-1} \mathbf{X}_o^\top \mathbf{X}_o)^{-1} \hat{\sigma}_{Y|X}^2 + \hat{\Delta} \hat{\Delta}^\top + \epsilon \mathbf{I}_p \right) \\ &\quad \left( n^{-1} (n^{-1} \mathbf{X}_o^\top \mathbf{X}_o)^{-1} \hat{\sigma}_{Y|X}^2 + m^{-1} (m^{-1} \mathbf{X}_1^\top \mathbf{X}_1)^{-1} \hat{\sigma}_{Y|\text{do}(X)}^2 + \hat{\Delta} \hat{\Delta}^\top + \epsilon \mathbf{I}_p \right)^{-1}, \end{aligned}$$

where we insert any almost surely converging estimators for  $\Delta$ ,  $\sigma_{Y|X}^2$  and  $\sigma_{Y|\text{do}(X)}^2$  instead of their ground-truth values. By almost sure convergence of linear estimators individually, we see that this holds specifically for  $\hat{\Delta} = \hat{\alpha}_o^n - \hat{\alpha}_1^m$ . Also, we can use the strong law of large numbers to conclude almost sure convergence of  $\hat{\sigma}_{Y|X}^2$  and  $\hat{\sigma}_{Y|\text{do}(X)}^2$ .

We now show  $\widehat{\mathbf{W}}_*^m \xrightarrow{a.s.} \mathbf{I}_p$ : First, we see that

$$(cm)^{-1} (n^{-1} \mathbf{X}_o^\top \mathbf{X}_o)^{-1} \hat{\sigma}_{Y|X}^2 \xrightarrow{a.s.} \mathbf{0} \quad \text{and} \quad m^{-1} (m^{-1} \mathbf{X}_1^\top \mathbf{X}_1)^{-1} \hat{\sigma}_{Y|\text{do}(X)}^2 \xrightarrow{a.s.} \mathbf{0},$$

since  $m^{-1} \mathbf{X}_1^\top \mathbf{X}_1 \hat{\sigma}_{Y|\text{do}(X)}^2$  and  $n^{-1} \mathbf{X}_o^\top \mathbf{X}_o \hat{\sigma}_{Y|X}^2$  converge almost surely to constants and  $m^{-1}$  vanishes. Hence,

$$\widehat{\mathbf{W}}_*^m \xrightarrow{a.s.} (\Delta \Delta^\top + \epsilon \mathbf{I}_p) (\Delta \Delta^\top + \epsilon \mathbf{I}_p)^{-1} = \mathbf{I}_p.$$

□

## A.4 THEOREM 4.4

*Proof.* We have that  $\mathbf{I}_p$  is bounded in norm, almost surely. So we can apply Lemma B.2 to see that

$$\lim_{m \rightarrow \infty} \text{MSE}(\hat{\alpha}_{\widehat{\mathbf{W}}_*^m}^m) \leq \lim_{m \rightarrow \infty} \text{MSE}(\hat{\alpha}_1^m) = 0.$$

□

## A.5 PROPOSITION 4.5

*Proof.* By Theorem 4.4, it suffices to show that  $\widehat{\mathbf{W}}_{\ell^2}^m \xrightarrow{a.s.} \mathbf{I}_p$ . Since the other quantities  $\mathbf{Cov}(\hat{\alpha}_1^m)$ ,  $\mathbf{Cov}(\hat{\alpha}_0^n)$  for estimating  $\mathbf{W}^m$  remain unchanged compared to  $\widehat{\mathbf{W}}^m$ , it suffices to show that the modified computation of  $\widehat{\Delta}_m$  we call  $\hat{\Delta}_m^{\ell^2}$  converges almost surely to the true  $\Delta = \alpha_1 - \alpha_0$ , where  $\alpha_1$  and  $\alpha_0$  are short-hand for  $\mathbb{E}_{\text{int}}[Y|\mathbf{X} = \mathbf{x}]$  and  $\mathbb{E}_{\text{obs}}[Y|\mathbf{X} = \mathbf{x}]$ , respectively. We observe that  $\hat{\Delta}_m^{\ell^2}$  has a closed-form solution

$$\hat{\Delta}_m^{\ell^2} = -(\mathbf{X}_1^\top \mathbf{X}_1 + \lambda_{\ell^2} \mathbf{I}_p)^{-1} \mathbf{X}_1^\top (\mathbf{y}_1 - \mathbf{X}_1 \hat{\alpha}_0^n) \quad (\text{B})$$

$$= (\mathbf{X}_1^\top \mathbf{X}_1 + \lambda_{\ell^2} \mathbf{I}_p)^{-1} \mathbf{X}_1^\top \mathbf{X}_1 \hat{\alpha}_0^n - (\mathbf{X}_1^\top \mathbf{X}_1 + \lambda_{\ell^2} \mathbf{I}_p)^{-1} \mathbf{X}_1^\top \mathbf{y}_1, \quad (\text{C})$$

since  $\hat{\alpha}_0^n$  is again a closed-form solution to an ordinary least squares problem. Considering the first term in (C), we conclude almost sure convergence with respect to  $\alpha_1$  (it is simply the ridge regression solution on the interventional data, which is well-known to converge almost surely for fixed  $\lambda_{\ell^2}$ ). The second term satisfies

$$(\mathbf{X}_1^\top \mathbf{X}_1 + \lambda_{\ell^2} \mathbf{I}_p)^{-1} \mathbf{X}_1^\top \mathbf{X}_1 \xrightarrow{a.s.} \mathbf{I}_p \quad \text{and} \quad \hat{\alpha}_0^n \xrightarrow{a.s.} \alpha_0.$$

This leads to the desired conclusion.  $\square$

## B ADDITIONAL LEMMAS

**Lemma B.1.** *Let  $\widehat{\mathbf{W}}^m - \mathbf{W}^m \xrightarrow{P} \mathbf{0}^1$  and let there exist  $c > 0$ ,  $m' \in \mathbb{N}$ , such that  $\|\mathbf{W}^m\|_2 \leq c$ , for all  $m \geq m'$ , almost surely. Then, it holds that*

$$\lim_{m \rightarrow \infty} \text{MSE}(\hat{\alpha}_{\mathbf{W}^m}^m) \leq \lim_{m \rightarrow \infty} \text{MSE}(\hat{\alpha}_{\widehat{\mathbf{W}}^m}^m),$$

where  $\xrightarrow{P}$  denotes convergence in probability.

*Proof.* We derive a lower bound on  $\text{MSE}(\hat{\alpha}_{\widehat{\mathbf{W}}^m}^m)$  by using the formulation

$$\begin{aligned} \text{MSE}(\hat{\alpha}_{\widehat{\mathbf{W}}^m}^m) &= \mathbb{E} \left[ \mathbb{1} \left\{ \|\widehat{\mathbf{W}}^m - \mathbf{W}^m\|_2 \leq \epsilon \right\} \|\hat{\alpha}_{\widehat{\mathbf{W}}^m}^m - \alpha\|_2^2 \right] + \\ &\quad \mathbb{E} \left[ \mathbb{1} \left\{ \|\widehat{\mathbf{W}}^m - \mathbf{W}^m\|_2 > \epsilon \right\} \|\hat{\alpha}_{\widehat{\mathbf{W}}^m}^m - \alpha\|_2^2 \right], \quad \forall \epsilon > 0. \end{aligned} \quad (\text{D})$$

We bound the second summand of (D) from below by zero. For the first summand, we use reverse triangle inequality, which yields

$$\begin{aligned} &\mathbb{E} \left[ \mathbb{1} \left\{ \|\widehat{\mathbf{W}}^m - \mathbf{W}^m\|_2 \leq \epsilon \right\} \|\hat{\alpha}_{\widehat{\mathbf{W}}^m}^m - \alpha\|_2^2 \right] = \mathbb{E} \left[ \mathbb{1} \left\{ \|\widehat{\mathbf{W}}^m - \mathbf{W}^m\|_2 \leq \epsilon \right\} \|\hat{\alpha}_{\widehat{\mathbf{W}}^m}^m - \hat{\alpha}_{\mathbf{W}^m}^m - (\alpha - \hat{\alpha}_{\mathbf{W}^m}^m)\|_2^2 \right] \\ &\geq \mathbb{E} \left[ \mathbb{1} \left\{ \|\widehat{\mathbf{W}}^m - \mathbf{W}^m\|_2 \leq \epsilon \right\} \|\hat{\alpha}_{\widehat{\mathbf{W}}^m}^m - \alpha\|_2^2 \right] - 2 \sqrt{\mathbb{E} \left[ \mathbb{1} \left\{ \|\widehat{\mathbf{W}}^m - \mathbf{W}^m\|_2 \leq \epsilon \right\} \|\hat{\alpha}_{\widehat{\mathbf{W}}^m}^m - \hat{\alpha}_{\mathbf{W}^m}^m\|_2^2 \right] \mathbb{E} [\|\hat{\alpha}_{\mathbf{W}^m}^m - \alpha\|_2^2]} + \\ &\quad \mathbb{E} \left[ \mathbb{1} \left\{ \|\widehat{\mathbf{W}}^m - \mathbf{W}^m\|_2 \leq \epsilon \right\} \|\hat{\alpha}_{\widehat{\mathbf{W}}^m}^m - \hat{\alpha}_{\mathbf{W}^m}^m\|_2^2 \right] \\ &\geq \text{MSE}(\hat{\alpha}_{\mathbf{W}^m}^m) - \mathbb{E} \left[ \mathbb{1} \left\{ \|\widehat{\mathbf{W}}^m - \mathbf{W}^m\|_2 > \epsilon \right\} \|\hat{\alpha}_{\widehat{\mathbf{W}}^m}^m - \alpha\|_2^2 \right] - \\ &\quad 2 \sqrt{\mathbb{E} \left[ \mathbb{1} \left\{ \|\widehat{\mathbf{W}}^m - \mathbf{W}^m\|_2 \leq \epsilon \right\} \|\hat{\alpha}_{\widehat{\mathbf{W}}^m}^m - \hat{\alpha}_{\mathbf{W}^m}^m\|_2^2 \right] \mathbb{E} [\|\hat{\alpha}_{\mathbf{W}^m}^m - \alpha\|_2^2]}. \end{aligned} \quad (\text{E})$$

For any constant  $\mathbf{W}, \mathbf{W}' \in \mathbb{R}^{p \times p}$ , we rewrite

$$\begin{aligned} \mathbb{E} [\|\hat{\alpha}_{\mathbf{W}'}^m - \hat{\alpha}_{\mathbf{W}}^m\|_2^2] &= \mathbb{E} [\|(\mathbf{W}' - \mathbf{W})\hat{\alpha}_1^m + (\mathbf{W} - \mathbf{W}')\hat{\alpha}_0^n\|_2^2] \\ &\leq 2(\|\mathbf{W} - \mathbf{W}'\|_2^2 \text{Tr}(\mathbb{E}[\hat{\alpha}_1^m \hat{\alpha}_1^{m\top}]) + \|\mathbf{W} - \mathbf{W}'\|_2^2 \text{Tr}(\mathbb{E}[\hat{\alpha}_0^n \hat{\alpha}_0^{n\top}])) \\ &= 2\|\mathbf{W} - \mathbf{W}'\|_2^2 \left[ (\|\mathbb{E}[\hat{\alpha}_1^m]\|_2^2 + \text{Tr}(\mathbf{Cov}(\hat{\alpha}_1^m))) + (\|\mathbb{E}[\hat{\alpha}_0^n]\|_2^2 + \text{Tr}(\mathbf{Cov}(\hat{\alpha}_0^n))) \right], \end{aligned}$$

<sup>1</sup>We note that  $\mathbf{W}^m$  may be random.

where we have used Young's inequality in the first step. We see that both  $\|\mathbb{E}[\hat{\alpha}_1^m]\|_2^2$  and  $\|\mathbb{E}[\hat{\alpha}_0^n]\|_2^2$  remain bounded  $\forall m$ , while  $\text{Tr}(\mathbf{Cov}(\hat{\alpha}_0^n))$  and  $\text{Tr}(\mathbf{Cov}(\hat{\alpha}_1^m))$  decrease monotonically in  $m$ . Hence, we conclude that for any  $\epsilon' > 0$ , there exists an  $\epsilon > 0$  such that

$$\mathbb{E} \left[ \|\hat{\alpha}_{\mathbf{W}'}^m - \hat{\alpha}_{\mathbf{W}}^m\|_2^2 \right] \leq \epsilon', \quad \forall m \in \mathbb{N} \text{ and } \forall \mathbf{W}, \mathbf{W}' \in \mathbb{R}^{p \times p} \text{ s.t. } \|\mathbf{W} - \mathbf{W}'\|_2 \leq \epsilon. \quad (\text{F})$$

Since  $\|\mathbf{W}^m\|_2 \leq c$  for all  $m \geq m'$ , we have that  $\|\hat{\alpha}_{\mathbf{W}^m}^m - \alpha\|_2^2$  is also bounded by some constant  $c' > 0$ , for all  $m \geq m'$ , almost surely. We now fix an  $\epsilon' > 0$  and choose a corresponding  $\epsilon$  such that (F) holds. We then conclude from (E) that

$$\begin{aligned} \text{MSE}(\hat{\alpha}_{\mathbf{W}^m}^m) &\geq \mathbb{E} \left[ \mathbb{1} \left\{ \|\widehat{\mathbf{W}}^m - \mathbf{W}^m\|_2 \leq \epsilon \right\} \|\hat{\alpha}_{\mathbf{W}^m}^m - \alpha\|_2^2 \right] \\ &\geq \text{MSE}(\hat{\alpha}_{\mathbf{W}^m}^m) - 2\sqrt{\epsilon' \mathbb{E}[\|\hat{\alpha}_{\mathbf{W}^m}^m - \alpha\|_2^2]} - P(\|\widehat{\mathbf{W}}^m - \mathbf{W}^m\|_2 > \epsilon) c' \\ &\geq \text{MSE}(\hat{\alpha}_{\mathbf{W}^m}^m) - 2\sqrt{\epsilon' c'} - P(\|\widehat{\mathbf{W}}^m - \mathbf{W}^m\|_2 > \epsilon) c', \end{aligned}$$

for all  $m \geq m'$ . Thus, we conclude

$$\lim_{m \rightarrow \infty} \text{MSE}(\hat{\alpha}_{\mathbf{W}^m}^m) \geq \lim_{m \rightarrow \infty} \text{MSE}(\hat{\alpha}_{\mathbf{W}^m}^m) - 2\sqrt{\epsilon' c'}.$$

We can repeat this procedure for any  $\epsilon' > 0$  and therefore conclude

$$\lim_{m \rightarrow \infty} \text{MSE}(\hat{\alpha}_{\mathbf{W}^m}^m) \geq \lim_{m \rightarrow \infty} \text{MSE}(\hat{\alpha}_{\mathbf{W}^m}^m),$$

which is the desired result.  $\square$

**Lemma B.2.** *Let  $\widehat{\mathbf{W}}^m - \mathbf{W}^m \xrightarrow{a.s.} \mathbf{0}$  and let there exist some  $c > 0$ ,  $m' \in \mathbb{N}$ , such that  $\|\mathbf{W}^m\|_2 \leq c, \forall m \geq m'$ , almost surely. Then, it holds that*

$$\lim_{m \rightarrow \infty} \text{MSE}(\hat{\alpha}_{\mathbf{W}^m}^m) \leq \lim_{m \rightarrow \infty} \text{MSE}(\hat{\alpha}_{\mathbf{W}^m}^m).$$

*Proof.* We again employ the formulation from (D), but this time to construct an upper bound. For the first term of (D), we see that

$$\begin{aligned} &\mathbb{E} \left[ \mathbb{1} \left\{ \|\widehat{\mathbf{W}}^m - \mathbf{W}^m\|_2 \leq \epsilon \right\} \|\hat{\alpha}_{\mathbf{W}^m}^m - \alpha\|_2^2 \right] = \mathbb{E} \left[ \mathbb{1} \left\{ \|\widehat{\mathbf{W}}^m - \mathbf{W}^m\|_2 \leq \epsilon \right\} \|\hat{\alpha}_{\mathbf{W}^m}^m - \hat{\alpha}_{\mathbf{W}^m}^m + \hat{\alpha}_{\mathbf{W}^m}^m - \alpha\|_2^2 \right] \\ &\leq \text{MSE}(\hat{\alpha}_{\mathbf{W}^m}^m) + 2\sqrt{\mathbb{E} \left[ \mathbb{1} \left\{ \|\widehat{\mathbf{W}}^m - \mathbf{W}^m\|_2 \leq \epsilon \right\} \|\hat{\alpha}_{\mathbf{W}^m}^m - \hat{\alpha}_{\mathbf{W}^m}^m\|_2^2 \right] \mathbb{E}[\|\hat{\alpha}_{\mathbf{W}^m}^m - \alpha\|_2^2]} + \\ &\quad \mathbb{E} \left[ \mathbb{1} \left\{ \|\widehat{\mathbf{W}}^m - \mathbf{W}^m\|_2 \leq \epsilon \right\} \|\hat{\alpha}_{\mathbf{W}^m}^m - \hat{\alpha}_{\mathbf{W}^m}^m\|_2^2 \right], \end{aligned} \quad (\text{G})$$

by triangle inequality and the Cauchy-Schwarz inequality. Since for  $m \geq m'$  it holds that  $\|\mathbf{W}^m\|_2 \leq c$ , almost surely, there exists a constant  $c' > 0$  such that  $\mathbb{E}[\|\hat{\alpha}_{\mathbf{W}^m}^m - \alpha\|_2^2] \leq c'$ , for all  $m \geq m'$ . This is true because the two estimators  $\hat{\alpha}_1^m$  and  $\hat{\alpha}_0^n$  have both bounded mean squared error for any sample size  $m$ .

Analogously to the proof for Lemma B.1, we now fix an  $\epsilon' > 0$  and choose a corresponding  $\epsilon$  such that (F) holds. For  $m \geq m'$ , we then conclude from (G) that

$$\begin{aligned} &\mathbb{E} \left[ \mathbb{1} \left\{ \|\widehat{\mathbf{W}}^m - \mathbf{W}^m\|_2 \leq \epsilon \right\} \|\hat{\alpha}_{\mathbf{W}^m}^m - \alpha\|_2^2 \right] \\ &\leq \text{MSE}(\hat{\alpha}_{\mathbf{W}^m}^m) + 2\sqrt{\epsilon' \mathbb{E}[\|\hat{\alpha}_{\mathbf{W}^m}^m - \alpha\|_2^2]} + \epsilon' \\ &\leq \text{MSE}(\hat{\alpha}_{\mathbf{W}^m}^m) + 2\sqrt{\epsilon' c'} + \epsilon'. \end{aligned} \quad (\text{H})$$

This bounds the first term of (D). For the second term of (D), we use almost sure convergence of  $\widehat{\mathbf{W}}^m - \mathbf{W}^m$ . Since  $\mathbf{W}^m$  is bounded in the limit, almost surely, so is  $\widehat{\mathbf{W}}^m$ . Formally,  $\|\widehat{\mathbf{W}}^m\|_2 \leq c'', \forall m \geq m'$  for some  $m' \in \mathbb{N}$ , almost surely.

We use this to bound  $\|\hat{\alpha}_{\widehat{\mathbf{W}}^m}^m - \alpha\|_2^2 < c'''$  for all  $m \geq m'$ , almost surely, for some  $c''' > 0$ . Now, we apply iterated expectations to the second term of (D) to see that for all  $m \geq m'$

$$\begin{aligned} \mathbb{E} \left[ \mathbb{1} \left\{ \|\widehat{\mathbf{W}}^m - \mathbf{W}^m\|_2 > \epsilon \right\} \|\hat{\alpha}_{\widehat{\mathbf{W}}^m}^m - \alpha\|_2^2 \right] &= \mathbb{E}_{\widehat{\mathbf{W}}^m} \left[ \mathbb{1} \left\{ \|\widehat{\mathbf{W}}^m - \mathbf{W}^m\|_2 > \epsilon \right\} \mathbb{E}_{\hat{\alpha}_{\widehat{\mathbf{W}}^m}^m | \widehat{\mathbf{W}}^m} \left[ \|\hat{\alpha}_{\widehat{\mathbf{W}}^m}^m - \alpha\|_2^2 \right] \right] \\ &\leq \mathbb{P} \left( \|\widehat{\mathbf{W}}^m - \mathbf{W}^m\|_2 > \epsilon \right) c''', \end{aligned} \tag{I}$$

almost surely. Now, we can combine the inequalities (H) and (I) to obtain

$$\text{MSE} \left( \hat{\alpha}_{\widehat{\mathbf{W}}^m}^m \right) \leq \text{MSE} \left( \hat{\alpha}_{\mathbf{W}^m}^m \right) + 2\sqrt{\epsilon' c'} + \epsilon' + \mathbb{P} \left( \|\widehat{\mathbf{W}}^m - \mathbf{W}^m\|_2 > \epsilon \right) c''',$$

for all  $m \geq m''$ . Almost sure convergence implies consistency of  $\widehat{\mathbf{W}}^m - \mathbf{W}^m$  with respect to  $\mathbf{0}$ , so we see that  $\mathbb{P} \left( \|\widehat{\mathbf{W}}^m - \mathbf{W}^m\|_2 > \epsilon \right)$  vanishes in the limit  $m \rightarrow \infty$ , for all  $\epsilon > 0$ . We can repeat this procedure for any  $\epsilon' > 0$ . This implies the desired result.  $\square$

## C DETAILED DERIVATION OF OPTIMAL WEIGHTING SCHEMES

In general, we observe that

$$\begin{aligned} \text{Bias}(\hat{\alpha}_{\mathbf{W}}^m) &= \mathbf{W}\alpha + (\mathbf{I} - \mathbf{W})(\alpha + \Delta) - \alpha = (\mathbf{I} - \mathbf{W})\Delta, \\ \text{Cov}(\hat{\alpha}_{\mathbf{W}}^m) &= \mathbf{W}\text{Cov}(\hat{\alpha}_{\mathbf{I}}^m)\mathbf{W}^\top + (\mathbf{I} - \mathbf{W})\text{Cov}(\hat{\alpha}_{\mathbf{0}}^n)(\mathbf{I} - \mathbf{W})^\top. \end{aligned}$$

### C.1 OPTIMAL SCALAR WEIGHT

Here, we have

$$\begin{aligned} &\frac{\partial}{\partial w} \text{MSE} \left( \hat{\alpha}_{w\mathbf{I}_p}^m \right) \\ &= \frac{\partial}{\partial w} \left\| \text{Bias} \left( \hat{\alpha}_{w\mathbf{I}_p}^m \right) \right\|_2^2 + \frac{\partial}{\partial w} \text{Tr} \left( \text{Cov} \left( \hat{\alpha}_{w\mathbf{I}_p}^m \right) \right) \\ &= -2(1-w)\|\Delta\|_2^2 + 2w\text{Tr}(\text{Cov}(\hat{\alpha}_{\mathbf{I}}^m)) - 2(1-w)\text{Tr}(\text{Cov}(\hat{\alpha}_{\mathbf{0}}^n)) \stackrel{!}{=} 0. \end{aligned}$$

By rearranging, we get

$$w_*^m = \frac{\text{Tr}(\text{Cov}(\hat{\alpha}_{\mathbf{0}}^n)) + \|\Delta\|_2^2}{\text{Tr}(\text{Cov}(\hat{\alpha}_{\mathbf{I}}^m)) + \text{Tr}(\text{Cov}(\hat{\alpha}_{\mathbf{0}}^n)) + \|\Delta\|_2^2}.$$

### C.2 OPTIMAL DIAGONAL WEIGHT MATRIX

Here, we see that the objective decouples into a sum over the individual dimensions

$$\text{MSE} \left( \hat{\alpha}_{w\mathbf{I}_p}^m \right) = \sum_{k=1}^p \left( 1 - w^{(k)} \right)^2 \Delta^{(k)2} + w^{(k)2} \text{Cov}^{(k,k)}(\hat{\alpha}_{\mathbf{I}}^m) + \left( 1 - w^{(k)} \right)^2 \text{Cov}^{(k,k)}(\hat{\alpha}_{\mathbf{0}}^n).$$

Thus, we optimize for each dimension  $k$  separately and obtain

$$w_*^{m(k)} = \frac{\text{Cov}^{(k,k)}(\hat{\alpha}_{\mathbf{0}}^n) + \Delta^{(k)2}}{\text{Cov}^{(k,k)}(\hat{\alpha}_{\mathbf{I}}^m) + \text{Cov}^{(k,k)}(\hat{\alpha}_{\mathbf{0}}^n) + \Delta^{(k)2}}.$$

### C.3 OPTIMAL WEIGHT MATRIX

Using  $\frac{\partial}{\partial \mathbf{W}} \text{Tr}(\mathbf{W}\mathbf{A}\mathbf{W}^\top) = 2\mathbf{W}\mathbf{A}$ , since  $\mathbf{A}$  is symmetric, we observe that

$$\begin{aligned} & \frac{\partial}{\partial \mathbf{W}} \text{MSE}(\hat{\alpha}_{\mathbf{W}}^m) \\ &= 2\mathbf{W}(\text{Cov}(\hat{\alpha}_1^m) + \text{Cov}(\hat{\alpha}_0^n) + \Delta\Delta^\top) - 2(\Delta\Delta^\top + \text{Cov}(\hat{\alpha}_0^n)) \\ &\stackrel{!}{=} \mathbf{0}. \end{aligned}$$

We see that this minimum is attained for

$$(\text{Cov}(\hat{\alpha}_0^n) + \Delta\Delta^\top)(\text{Cov}(\hat{\alpha}_1^m) + \text{Cov}(\hat{\alpha}_0^n) + \Delta\Delta^\top)^{-1}.$$

### D NON ZERO-MEAN EXOGENOUS VARIABLES

All results established here can readily be extended to settings, where any of the exogenous variables have non-zero mean, i.e.,  $\mu_{\mathbf{N}_X}, \mu_{\tilde{\mathbf{N}}_X} := \mathbb{E}[\tilde{\mathbf{N}}_X], \mu_{\mathbf{N}_Z}, \mu_{N_Y}$  (see (1)–(3)) may be non-zero. In order to extend the practical estimators introduced here, one needs to consider the following two pre-processing steps:

First, we center both treatment distributions separately, without scaling:

$$\mathbf{x}'_i \leftarrow \mathbf{x}_i - n^{-1} \sum_{j \in 1, \dots, n} \mathbf{x}_j, \quad \forall i \in 1, \dots, n, \quad (\text{J})$$

$$\mathbf{x}'_i \leftarrow \mathbf{x}_i - m^{-1} \sum_{j \in n+1, \dots, n+m} \mathbf{x}_j, \quad \forall i \in n+1, \dots, n+m. \quad (\text{K})$$

In this manner, both treatment variables become zero-mean.

Furthermore, we add a dummy dimension with value one to all treatment vectors:

$$\mathbf{x}''_i \leftarrow (\mathbf{x}'_i, 1), \quad \forall i \in 1, \dots, n+m.$$

This naturally adds one more dimension also to  $\alpha$ , which corresponds to the intercept term. We then use the constructed  $\mathbf{x}''_i$  to compute the weight matrices proposed in this work.

Finally, we see that the intercept term must be identical for both distributions, interventional and observational:

$$\mathbb{E}[Y \mid \mathbf{X}' = \mathbf{x}'] = \gamma^\top \mathbb{E}[\mathbf{Z} \mid \mathbf{X}' = \mathbf{x}'] + \alpha^\top \mathbf{x}' + \mu_{N_Y}.$$

We then have in the observational setting (data points  $1, \dots, n$ ) that

$$\begin{aligned} \gamma^\top \mathbb{E}[\mathbf{Z} \mid \mathbf{X}' = \mathbf{x}'] &= \gamma^\top \mu_{\mathbf{N}_Z} + \gamma^\top \Sigma_{\mathbf{N}_Z} \mathbf{B}^\top (\Sigma_{\mathbf{N}_X} + \mathbf{B} \Sigma_{\mathbf{N}_Z} \mathbf{B}^\top)^{-1} (\mathbf{x}' - \mathbb{E}[\mathbf{X}']) \\ &= \gamma^\top \mu_{\mathbf{N}_Z} + \Delta^\top \mathbf{x}', \end{aligned}$$

where  $\mathbb{E}[\mathbf{X}'] = \mathbf{0}$  due to (J).

For the interventional data, we have independence between  $\mathbf{X}'$  and  $\mathbf{Z}$  by definition and so we trivially get

$$\gamma^\top \mathbb{E}[\mathbf{Z} \mid \mathbf{X}' = \mathbf{x}'] = \gamma^\top \mu_{\mathbf{N}_Z}$$

here. Thus, the intercept is  $\gamma^\top \mu_{\mathbf{N}_Z} + \mu_{N_Y}$  for both distributions and we fix  $\hat{\Delta}^{(p+1)} = 0$ .

## E SAMPLE IMBALANCE

We see that the ground truth covariance matrices of  $\hat{\alpha}_1^m$  and  $\hat{\alpha}_0^n$  adapt to changes in the sample sizes, keeping the distributions of all variables fixed. For instance, we see that

$$\text{Cov}(\hat{\alpha}_1^m) = (\mathbf{X}_1^\top \mathbf{X}_1)^{-1} \sigma_{Y|\text{do}(X)}^2 = m^{-1} (m^{-1} \mathbf{X}_1^\top \mathbf{X}_1)^{-1} \sigma_{Y|\text{do}(X)}^2.$$

The term  $(m^{-1} \mathbf{X}_1^\top \mathbf{X}_1)^{-1} \sigma_{Y|\text{do}(X)}^2$  is bounded in probability, for large enough  $m$ . Accordingly, this implies that  $\text{Cov}(\hat{\alpha}_1^m) \xrightarrow{\text{P}} \mathbf{0}$ . Thus, when keeping  $n$  fixed, we obtain  $\mathbf{W}_*^m \xrightarrow{\text{P}} \mathbf{I}_p$ , for  $m \rightarrow \infty$ .

On the other hand, if we keep  $m$  fixed and consider the limit  $n \rightarrow \infty$  instead, we observe that

$$\mathbf{W}_*^m \xrightarrow{\text{P}} \Delta \Delta^\top (\text{Cov}(\hat{\alpha}_1^m) + \Delta \Delta^\top)^{-1}.$$

We note that we do not have  $\mathbf{W}_*^m \xrightarrow{\text{P}} \mathbf{0}$  here in general, because the bias in  $\hat{\alpha}_0^n$  remains, independent of the sample size  $n$ .
